# Supplementary material for: Electrocatalytic reduction of oxygen at ordered mesoporous carbon functionalized with tetrathiafulvalene
Source: Royal Society of Chemistry journal article supplement (doi:10.1039/b919532g), 2010-01-01
Supplement: b919532g.pdf [file b919532g.pdf]

1     **SUPPORTING INFORMATION**

2

3     **Electrocatalytic reduction of oxygen at ordered mesoporous carbon**  
4     **functionalized with tetrathiafulvalene**

5

6     Jean Chrysostome NDAMANISHA, Xiangjie Bo and Li-ping Guo\*

7     Faculty of Chemistry, Northeast Normal University, Changchun, 130024,

8     People's Republic of China

9

10

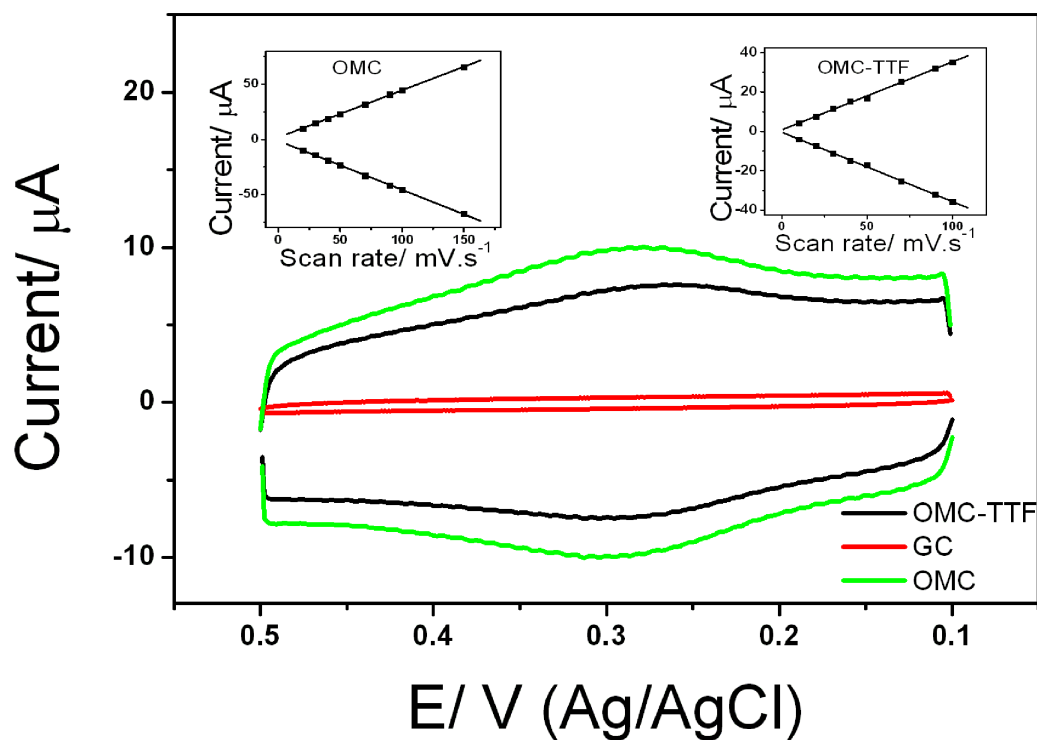

1

2 **Figure. S-1.** (A) Cyclic voltammograms of GC, OMC and OMC-TTF electrodes in 0.5 M  
3 sulfuric acid. Scan rate  $20\text{mV}\cdot\text{s}^{-1}$ . Insets: Plot of the peak current versus scan rates for OMC  
4 and OMC-TTF.

5

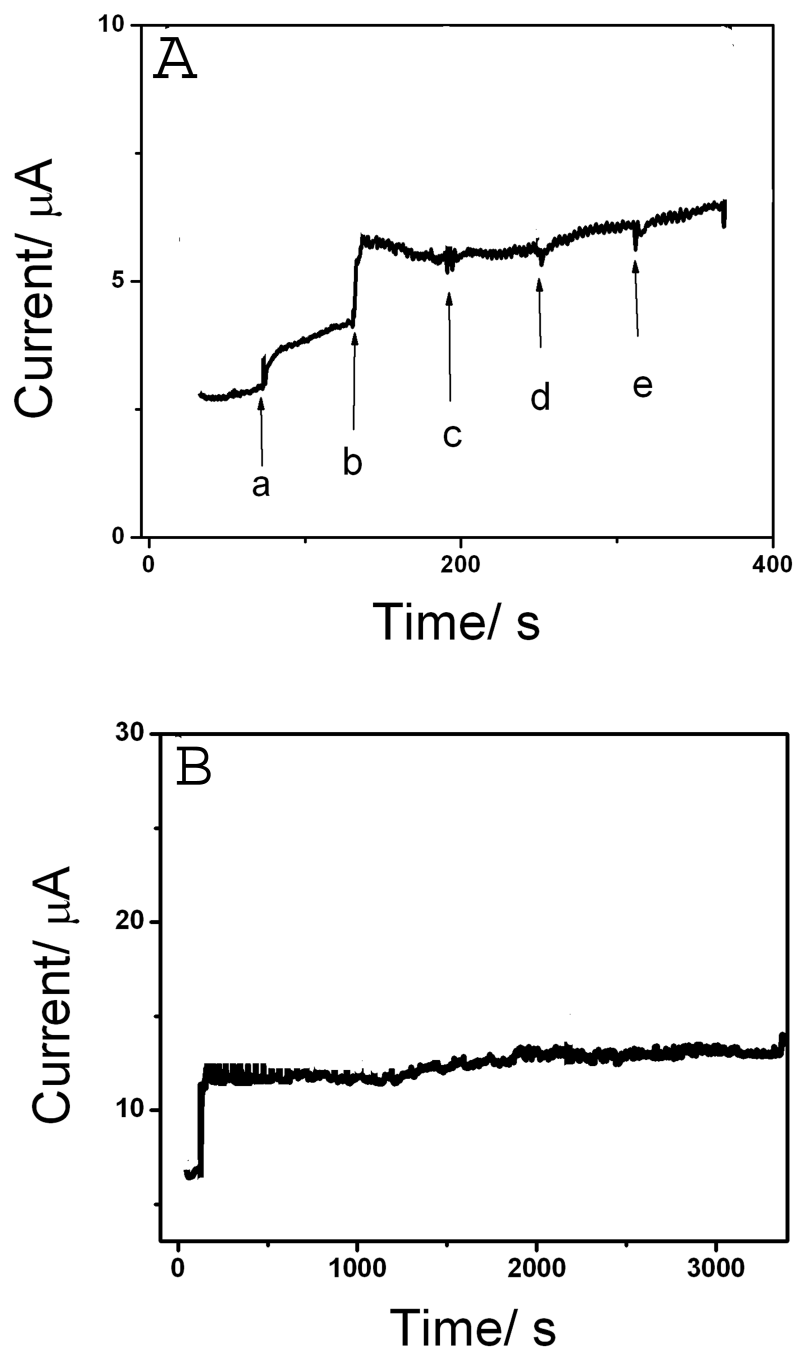

1

2 **Figure. S-2.** (A) Current-time responses of OMC-TTF electrodes in nitrogen-saturated PBS at -0.22 V upon successive additions of 13  $\mu\text{M}$  O<sub>2</sub> (a), 26  $\mu\text{M}$  O<sub>2</sub> (b),  
 3 80  $\mu\text{M}$  AA (c and d), 26  $\mu\text{M}$  UA. (B) Stability of the response of OMC-TTF electrode to  
 4 50  $\mu\text{M}$  O<sub>2</sub> at -0.22 V in nitrogen-saturated PBS.  
 5
